# Supplementary material for: Stability of numerous novel potassium chlorides at high pressure
Source: PubMed Central journal article supplement (PMC4876327; doi:10.1038/srep26265), 2016-05-23
Supplement: srep26265-s1.pdf [file srep26265-s1.pdf]

# Supplementary Information for: Stability of numerous novel potassium chlorides at high pressure

Weiwei Zhang<sup>1,2†</sup>, Artem R. Oganov<sup>2-5,†</sup>, Qiang Zhu<sup>2</sup>, Sergey S. Lobanov<sup>6,7</sup>, Elissaios Stavrou<sup>6</sup>,  
Alexander F. Goncharov<sup>6,8,9</sup>

Figure S1 to S9, Table S1 to S2.

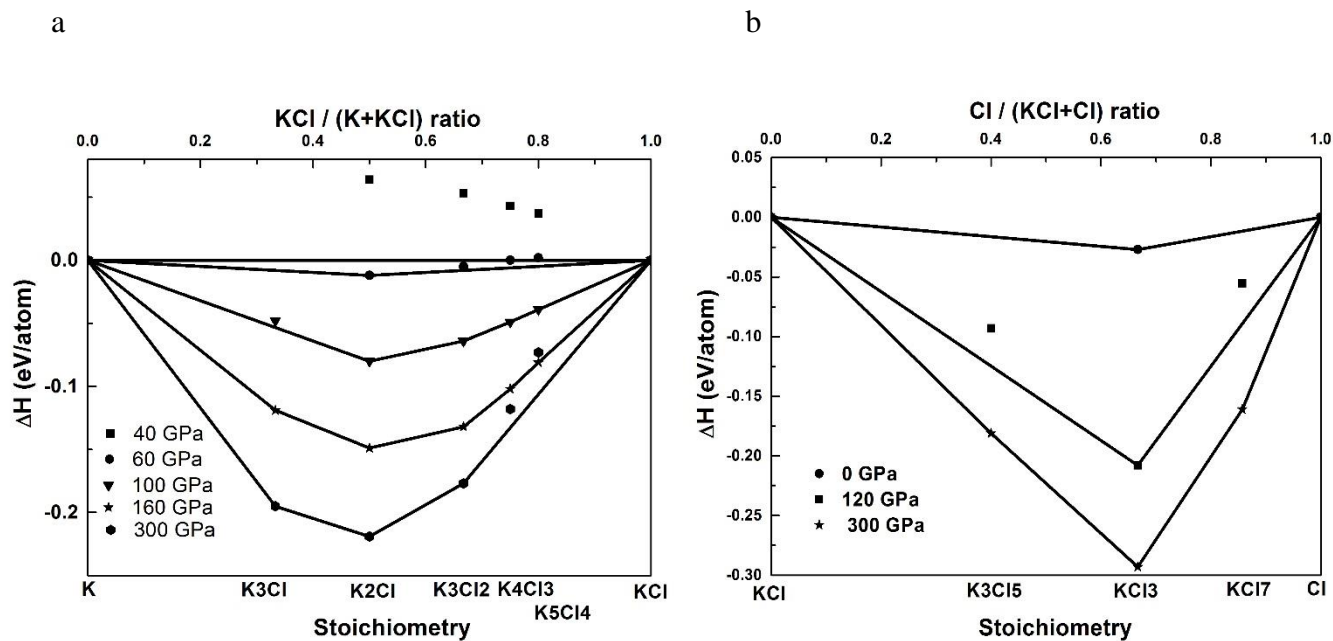

Supplementary Figure S1. Convex hull diagrams for (a) K-KCl system and (b) KCl-Cl system.

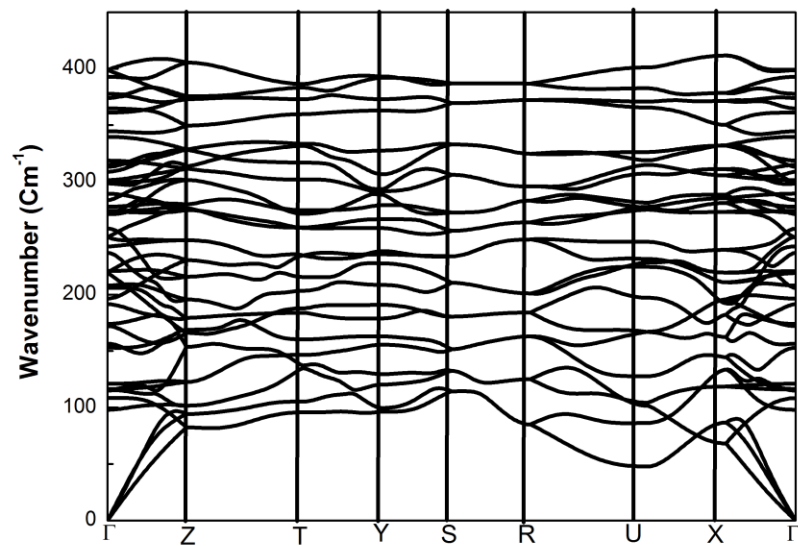

**Supplementary Figure S2.** Phonon dispersion curves of  $Pnma$ -  $KCl_3$  at 30 GPa. Such calculations were done for all predicted structures to ensure their dynamical stability.

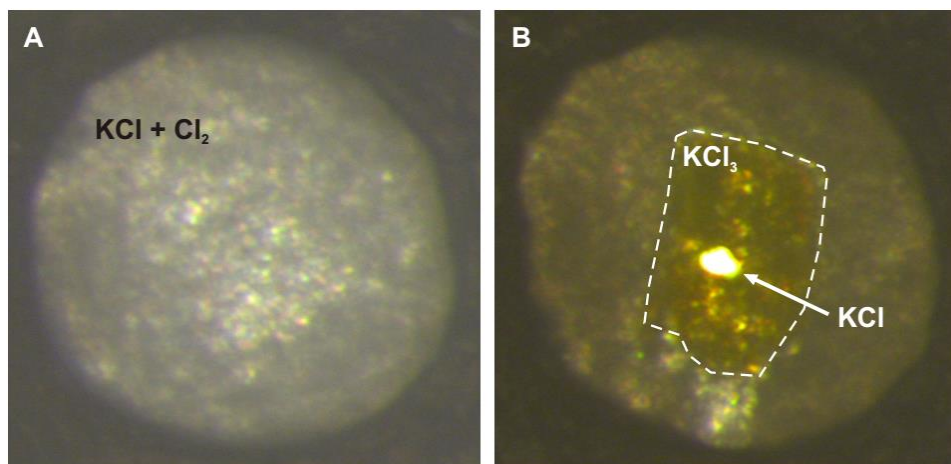

**Supplementary Figure S3.** Microphotograph of KCl + Cl<sub>2</sub> sample in the DAC cavity before (A) and after (B) laser heating at 25 GPa. In (B), the formation of new microcrystalline material is seen in the central area (marked by a white dashed line), which is surrounded by brownish KCl + Cl<sub>2</sub> unreacted sample. Transparent (bright white) spot in the center is pure KCl indicating that Cl<sub>2</sub> is consumed in the chemical reaction.

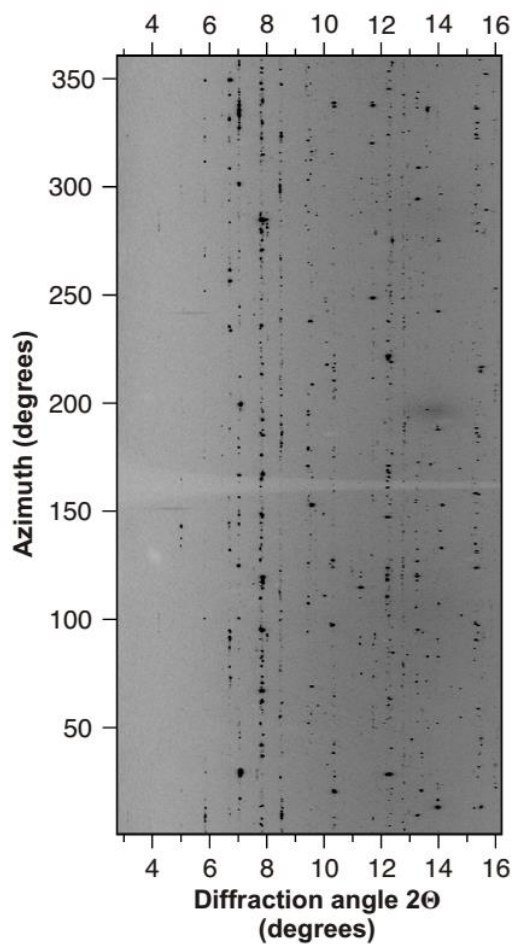

**Supplementary Figure S4.** Caked X-ray diffraction image of  $P\bar{3}c1$ - $\text{KCl}_3$  and  $\text{Cl}_2$  at 21 GPa corresponding to Fig. 3a. The highly textured pattern of  $\text{KCl}_3$  precluded Rietveld refinement. The wavelength is 0.3100 Å.

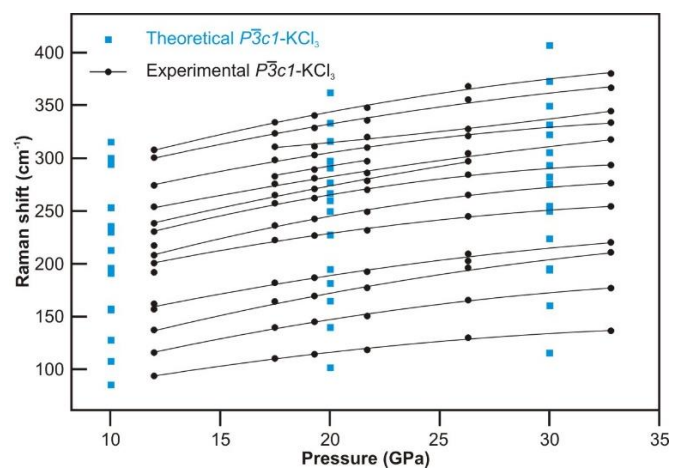

**Supplementary Figure S5.** Pressure dependence of the experimentally observed (black circles) vs theoretically computed  $P3c1$ - $KCl_3$  (blue rectangles) Raman bands. Black curves are quadratic fits to the experimentally observed Raman frequencies.

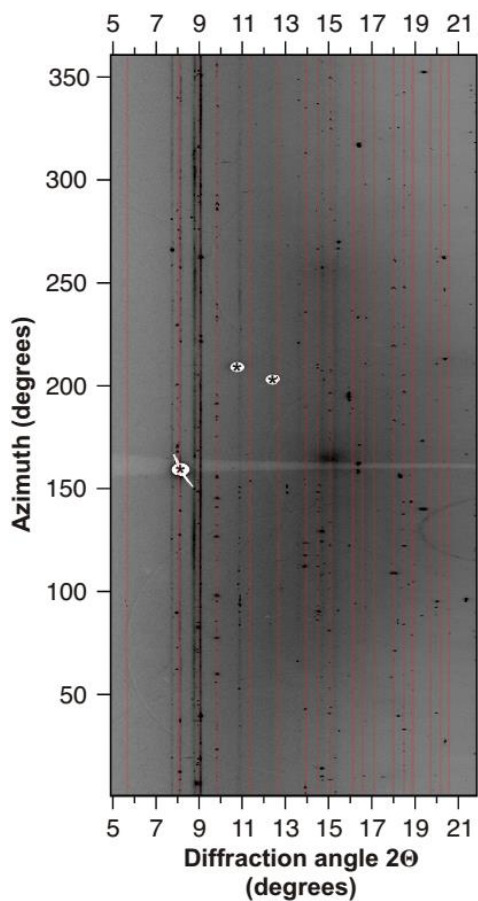

**Supplementary Figure S6.** Caked X-ray diffraction image of  $Pm\bar{3}n$ -KCl<sub>3</sub>, KCl, and Cl<sub>2</sub> at 57 GPa corresponding to Fig. 3c. KCl and Cl<sub>2</sub> form quasi-continuous diffraction lines, whereas  $Pm\bar{3}n$ -KCl<sub>3</sub> shows a highly textured pattern (red lines). White areas marked with an asterisk mask saturated areas of the imaging plate. The wavelength is 0.3344 Å.

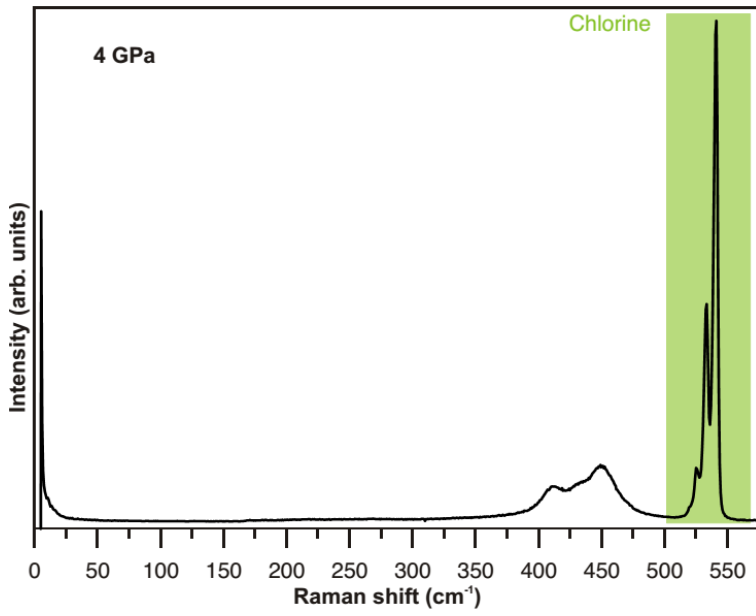

**Supplementary Figure S7.** Raman spectrum of a yet unknown K-Cl compound appearing on decompression to  $P < 10$  GPa at 300 K. Chlorine peaks are in the shaded green area.

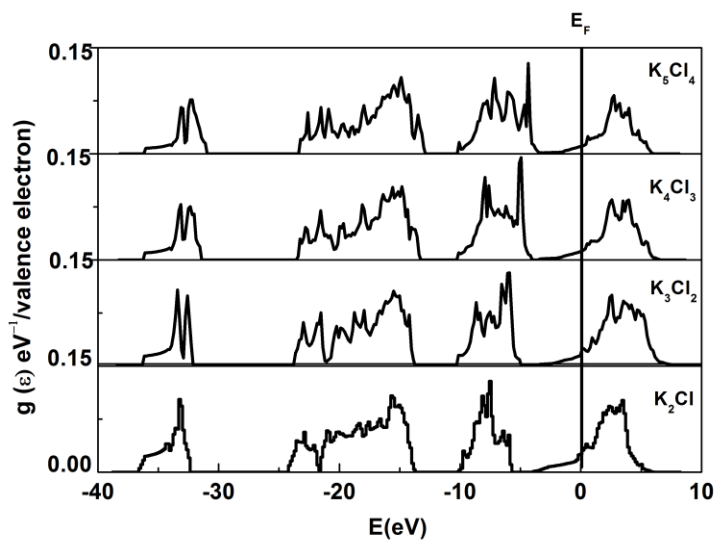

**Supplementary Figure S8.** The electronic density of states of layered  $\text{K}_{n+1}\text{Cl}_n$  homologs at 200 GPa.



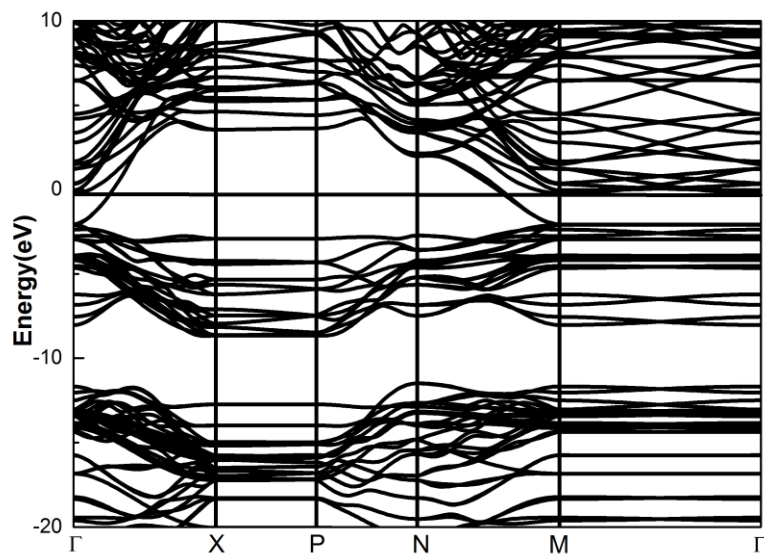

**Supplementary Figure S9.** Band structure of  $I4/mmm$ - $K_5Cl_4$  at 200 GPa.

**Supplementary Table S1.** Structure information and corresponding stability pressure regions for new compounds

| Class of phases                                                        | Composition                    | Pressure range of stability | Space group        | Cell parameters and atomic coordinates                                                   |                                                                                                                                                                                          |
|------------------------------------------------------------------------|--------------------------------|-----------------------------|--------------------|------------------------------------------------------------------------------------------|------------------------------------------------------------------------------------------------------------------------------------------------------------------------------------------|
| Insulating KCl                                                         | post-B2-KCl                    | 201-300                     | <i>I41/amd</i>     | $a = 3.368 \text{ \AA}$<br>$c = 6.955 \text{ \AA}$<br>(220 GPa)                          | K1 4a (0.000, 0.250, 0.875)<br>Cl1 4b (0.000, 0.750, 0.625)                                                                                                                              |
| Insulating Cl-rich phase                                               | KCl <sub>3</sub>               | 0-1.3                       | <i>P31m</i>        | $a = 8.587 \text{ \AA}$<br>$c = 6.206 \text{ \AA}$ (1atm)                                | K1 1a (0.000, 0.000, 0.504)<br>K2 2b (0.333, 0.667, 0.000)<br>Cl1 3c (0.667, 0.667, 0.251)<br>Cl2 3c (0.000, 0.512, 0.528)<br>Cl3 3c (0.000, 0.693, 0.805)                               |
|                                                                        | KCl <sub>3</sub>               | 1.3-9.3                     | <i>Pnma</i>        | $a = 8.708 \text{ \AA}$<br>$b = 5.426 \text{ \AA}$<br>$c = 7.946 \text{ \AA}$<br>(5 GPa) | K1 4c (x, 0.250, z)<br>x=0.173, z= 0.464<br>Cl1 4c (x, 0.250, z)<br>x = 0.933, z = 0.769<br>Cl2 4c (x, 0.250, z)<br>x = 0.622, z = 0.552<br>Cl3 4c (x, 0.250, z)<br>x = 0.838, z = 0.360 |
| Insulating and metallic Cl-rich phase                                  | KCl <sub>3</sub>               | 9.3-300                     | -<br><i>P 3 c1</i> | $a = 7.347 \text{ \AA}$<br>$c = 9.059 \text{ \AA}$<br>(20 GPa)                           | K1 2b (0.000, 0.000, 0.000)<br>K2 4d (0.333, 0.667, z)<br>z = 0.143<br>Cl1 6f (x, x, 0.250)<br>x = 0.260<br>Cl2 12g (x, y, z)<br>x=0.289, y=0.403, z= 0.897                              |
| Metallic Cl-rich phases                                                | KCl <sub>3</sub>               | 34-300                      | <i>Pm3n</i>        | $a = 4.169 \text{ \AA}$<br>(240 GPa)                                                     | K 2a (0.000, 0.000, 0.000)<br>Cl 6c (0.000, 0.500, 0.250)                                                                                                                                |
|                                                                        | KCl <sub>7</sub>               | 225-300                     | <i>Pm3</i>         | $a = 4.123 \text{ \AA}$<br>(240 GPa)                                                     | K 1a (0.000, 0.000, 0.000)<br>Cl1 1b (0.500, 0.500, 0.500)<br>Cl2 6g (x, 0.500, 0.000)<br>x=0.745                                                                                        |
|                                                                        | K <sub>3</sub> Cl <sub>5</sub> | 142-300                     | -<br><i>P 4 m2</i> | $a = 4.136 \text{ \AA}$<br>$c = 4.361 \text{ \AA}$<br>(240 GPa)                          | K1 1c (0.500, 0.500, 0.500)<br>K2 2g (0.500, 0.000, -z )<br>z=-0.245<br>Cl1 1b (0.500, 0.500, 0.000)<br>Cl2 4j (x, 0.000, z)<br>x=0.252, z=0.747                                         |
| Metallic K <sub>n+1</sub> Cl <sub>n</sub> , B2-layered superstructures | K <sub>2</sub> Cl              | 56-300                      | <i>I4/mmm</i>      | $a = 2.749 \text{ \AA}$<br>$c = 7.587 \text{ \AA}$<br>(200 GPa)                          | K1 4e (0.000, 0.000, z)<br>z=0.330<br>Cl 2a (0.000, 0.000, 0.000)                                                                                                                        |
|                                                                        | K <sub>3</sub> Cl <sub>2</sub> | 80-300                      | <i>I4/mmm</i>      | $a = 2.801 \text{ \AA}$<br>$c = 12.806 \text{ \AA}$<br>(200 GPa)                         | K1 2b (0.500, 0.500, 0.000)<br>K2 4e (0.500, 0.500, z)<br>z = 0.798<br>Cl 4e (0.000, 0.000, z )<br>z = 0.897                                                                             |
|                                                                        | K <sub>4</sub> Cl <sub>3</sub> | 62-264                      | <i>I4/mmm</i>      | $a = 2.791 \text{ \AA}$<br>$c = 18.190 \text{ \AA}$<br>(200 GPa)                         | K1 4e (0.000, 0.000, z)<br>z=0.072<br>K2 4e (0.000, 0.000, z)<br>z=0.784<br>Cl1 2b (0.000, 0.000, 0.500)<br>Cl2 4e (0.000, 0.000, z)<br>z= 0.646                                         |
|                                                                        | K <sub>5</sub> Cl <sub>4</sub> | 100-255                     | <i>I4/mmm</i>      | $a = 2.789 \text{ \AA}$<br>$c = 23.531 \text{ \AA}$<br>(200 GPa)                         | K1 2a (0.500, 0.500, 0.500)<br>K2 4e (0.500, 0.500, z)<br>z = 0.612<br>K3 4e (0.500, 0.500, z)<br>z=0.276<br>Cl1 4e (0.000, 0.000, z)<br>z=0.669<br>Cl2 4e (0.000, 0.000, z)             |

|                                     |         |         |          |                                                                 |                                                                                     |
|-------------------------------------|---------|---------|----------|-----------------------------------------------------------------|-------------------------------------------------------------------------------------|
|                                     |         |         |          |                                                                 | $z=0.557$                                                                           |
| Metallic layered fcc-superstructure | $K_3Cl$ | 149-300 | $I4/mmm$ | $a = 3.427 \text{ \AA}$<br>$c = 6.714 \text{ \AA}$<br>(200 GPa) | K1 2b (0.500,0.500,0.000)<br>K2 4d (0.500,0.000,0.250)<br>Cl 2a (0.000,0.000,0.000) |

**Supplementary Table S2.** Structures of B1-KCl and  $P31m$ -KCl<sub>3</sub> at 1 atm,  $Pnma$ -KCl<sub>3</sub> at 5GPa,  $P\bar{3}c1$ -KCl<sub>3</sub> and B2-KCl at 20 GPa, A15-type ( $Pm\bar{3}n$ ) KCl<sub>3</sub>,  $Pm3$ -KCl<sub>7</sub>,  $P\bar{4}m2$ -K<sub>3</sub>Cl<sub>5</sub>,  $I4/mmm$ -K<sub>3</sub>Cl and  $I4_1/amd$ -KCl at 240 GPa, and the corresponding atomic Bader charges (Q) and volumes (V).

|                                              | Lattice Parameters                                                            |         | X     | y     | Z     | Q,  e  | V, Å <sup>3</sup> |
|----------------------------------------------|-------------------------------------------------------------------------------|---------|-------|-------|-------|--------|-------------------|
| B1-KCl                                       | $a = 3.192 \text{ \AA}$                                                       | K(4b)   | 0.500 | 0.500 | 0.500 | +0.843 | 22.88             |
|                                              |                                                                               | Cl(4a)  | 0.000 | 0.000 | 0.000 | -0.843 | 42.17             |
| B2-KCl                                       | $a = 3.350 \text{ \AA}$                                                       | K(1a)   | 0.000 | 0.000 | 0.000 | +0.784 | 15.23             |
|                                              |                                                                               | Cl(1b)  | 0.500 | 0.500 | 0.500 | -0.784 | 22.38             |
| $Pnma$ -KCl <sub>3</sub>                     | $a = 8.708 \text{ \AA}$<br>$b = 5.427 \text{ \AA}$<br>$c = 7.947 \text{ \AA}$ | K(4c)   | 0.827 | 0.750 | 0.536 | +0.835 | 18.63             |
|                                              |                                                                               | Cl(4c)  | 0.933 | 0.250 | 0.769 | -0.279 | 25.22             |
|                                              |                                                                               | Cl(4c)  | 0.162 | 0.750 | 0.640 | -0.514 | 26.72             |
|                                              |                                                                               | Cl(4c)  | 0.878 | 0.750 | 0.052 | -0.042 | 23.31             |
| $P31m$ -KCl <sub>3</sub>                     | $a = 8.587 \text{ \AA}$<br>$c = 6.206 \text{ \AA}$                            | K(2b)   | 0.333 | 0.667 | 0.000 | +0.878 | 23.43             |
|                                              |                                                                               | K(1a)   | 0.000 | 0.000 | 0.504 | +0.876 | 25.13             |
|                                              |                                                                               | Cl(3c)  | 0.667 | 0.667 | 0.251 | -0.404 | 37.40             |
|                                              |                                                                               | Cl(3c)  | 0.000 | 0.512 | 0.528 | -0.049 | 33.20             |
|                                              |                                                                               | Cl(3c)  | 0.000 | 0.693 | 0.805 | -0.424 | 37.52             |
| $\bar{P}3c1$ -KCl <sub>3</sub>               | $a = 7.347 \text{ \AA}$<br>$c = 9.059 \text{ \AA}$                            | K(2b)   | 0.000 | 0.000 | 0.000 | +0.780 | 13.71             |
|                                              |                                                                               | K(4d)   | 0.333 | 0.667 | 0.143 | +0.794 | 14.53             |
|                                              |                                                                               | Cl(6f)  | 0.260 | 0.260 | 0.250 | -0.073 | 17.66             |
|                                              |                                                                               | Cl(12g) | 0.289 | 0.403 | 0.897 | -0.358 | 19.33             |
| $Pm\bar{3}n$ -KCl <sub>3</sub>               | $a = 4.169 \text{ \AA}$                                                       | K(2a)   | 0.000 | 0.000 | 0.000 | +0.519 | 7.91              |
|                                              |                                                                               | Cl(6c)  | 0.000 | 0.500 | 0.250 | -0.173 | 9.43              |
| $Pm3$ -KCl <sub>7</sub>                      | $a = 4.123 \text{ \AA}$                                                       | K(1a)   | 0.000 | 0.000 | 0.000 | +0.493 | 7.77              |
|                                              |                                                                               | Cl(1b)  | 0.500 | 0.500 | 0.500 | +0.063 | 8.47              |
|                                              |                                                                               | Cl(6g)  | 0.745 | 0.500 | 0.000 | -0.089 | 8.99              |
| $\bar{P}4m2$ -K <sub>3</sub> Cl <sub>5</sub> | $a = 4.136 \text{ \AA}$<br>$c = 4.361 \text{ \AA}$                            | K(1c)   | 0.500 | 0.500 | 0.500 | +0.566 | 8.47              |

|                                               |                                                     |        |       |       |       |        |        |
|-----------------------------------------------|-----------------------------------------------------|--------|-------|-------|-------|--------|--------|
|                                               |                                                     | K(2g)  | 0.500 | 0.000 | 0.245 | +0.542 | 8.18   |
|                                               |                                                     | Cl(1b) | 0.500 | 0.500 | 0.000 | -0.512 | 10.11  |
|                                               |                                                     | Cl(4j) | 0.252 | 0.000 | 0.747 | -0.285 | 9.91   |
| <i>I4<sub>1</sub>/amd</i> -KCl                | $a = 3.340 \text{ \AA}$<br>$c = 6.873 \text{ \AA}$  | K(4a)  | 0.000 | 0.250 | 0.875 | +0.545 | 8.595  |
|                                               |                                                     | Cl(4b) | 0.000 | 0.750 | 0.625 | -0.545 | 10.579 |
| <i>I4/mmm</i> -K <sub>3</sub> Cl              | $a = 3.365 \text{ \AA}$<br>$c = 6.583 \text{ \AA}$  | K(2b)  | 0.500 | 0.500 | 0.000 | +0.288 | 8.818  |
|                                               |                                                     | K(4d)  | 0.500 | 0.000 | 0.250 | +0.249 | 8.863  |
|                                               |                                                     | Cl(2a) | 0.000 | 0.000 | 0.000 | -0.786 | 10.726 |
| <i>I4/mmm</i> -K <sub>2</sub> Cl              | $a = 2.749 \text{ \AA}$<br>$c = 7.587 \text{ \AA}$  | K(4e)  | 0.000 | 0.000 | 0.330 | +0.344 | 9.19   |
|                                               |                                                     | Cl(2a) | 0.000 | 0.000 | 0.000 | -0.688 | 11.30  |
| <i>I4/mmm</i> -K <sub>3</sub> Cl <sub>2</sub> | $a = 2.801 \text{ \AA}$<br>$c = 12.806 \text{ \AA}$ | K(2b)  | 0.500 | 0.500 | 0.000 | +0.489 | 9.24   |
|                                               |                                                     | K(4e)  | 0.500 | 0.500 | 0.798 | +0.405 | 9.12   |
|                                               |                                                     | Cl(4e) | 0.000 | 0.000 | 0.897 | -0.655 | 11.39  |
| <i>I4/mmm</i> -K <sub>4</sub> Cl <sub>3</sub> | $a = 2.791 \text{ \AA}$<br>$c = 18.190 \text{ \AA}$ | K(4e)  | 0.000 | 0.000 | 0.784 | +0.413 | 9.13   |
|                                               |                                                     | K(4e)  | 0.000 | 0.000 | 0.072 | +0.449 | 9.17   |
|                                               |                                                     | Cl(2b) | 0.000 | 0.000 | 0.500 | -0.673 | 11.66  |
|                                               |                                                     | Cl(4e) | 0.000 | 0.000 | 0.646 | -0.621 | 11.31  |
| <i>I4/mmm</i> -K <sub>5</sub> Cl <sub>4</sub> | $a = 2.789 \text{ \AA}$<br>$c = 23.531 \text{ \AA}$ | K(2a)  | 0.000 | 0.000 | 0.000 | +0.569 | 9.19   |
|                                               |                                                     | K(4e)  | 0.500 | 0.500 | 0.612 | +0.563 | 9.13   |
|                                               |                                                     | K(4e)  | 0.500 | 0.500 | 0.276 | +0.410 | 9.12   |
|                                               |                                                     | Cl(4e) | 0.000 | 0.000 | 0.669 | -0.622 | 11.32  |
|                                               |                                                     | Cl(4e) | 0.000 | 0.000 | 0.557 | -0.636 | 11.58  |
